# Supplementary material
Source: MDPI journal article supplement (https://www.mdpi.com/2673-3501/4/3/12)
Supplement: s1 [file s1]

# Supplementary Materials: Effect of the Cross-Section Morphology in the Antimicrobial Properties of $\alpha$ -Ag<sub>2</sub>WO<sub>4</sub> Rods: An Experimental and Theoretical Study

Nivaldo F. Andrade Neto, Marisa C. Oliveira, José Heriberto O. Nascimento, Elson Longo, Renan A. P. Ribeiro, Mauricio R. D. Bomio and Fabiana V. Motta

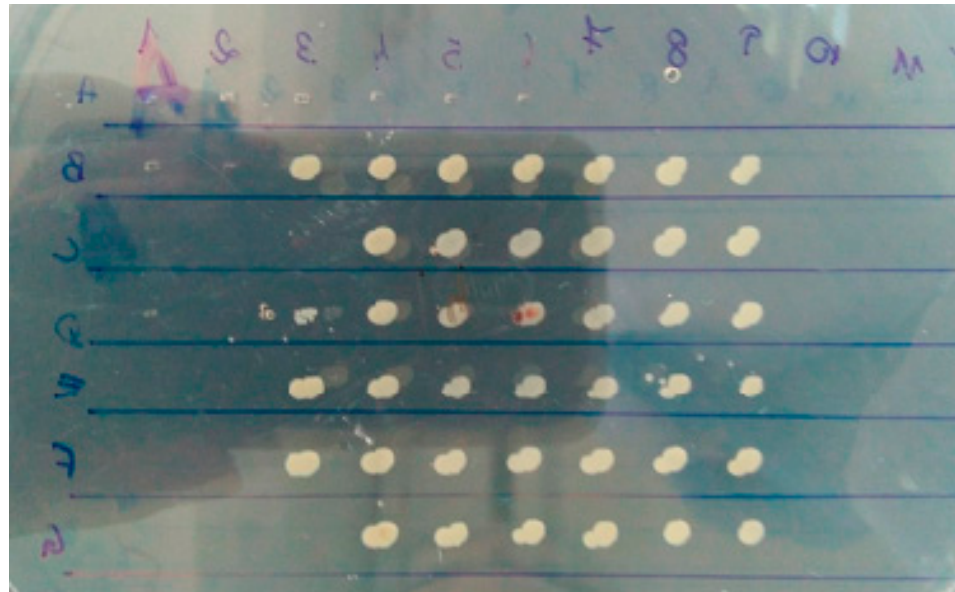

**Figure S1.** Minimal inhibitory concentration (MIC) for AW30 (B, C, and D) and AW70 (E, F, and G) samples against *E. coli*.

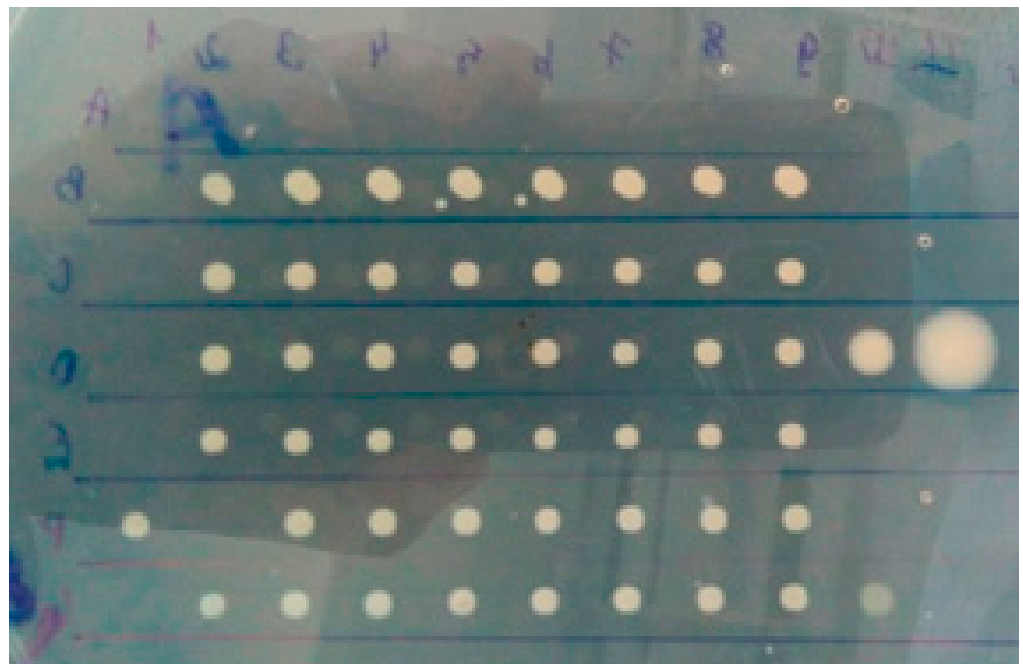

**Figure S2.** Minimal inhibitory concentration (MIC) for AW30 (B, C, and D) and AW70 (E, F, and G) samples against *Salmonella spp.*

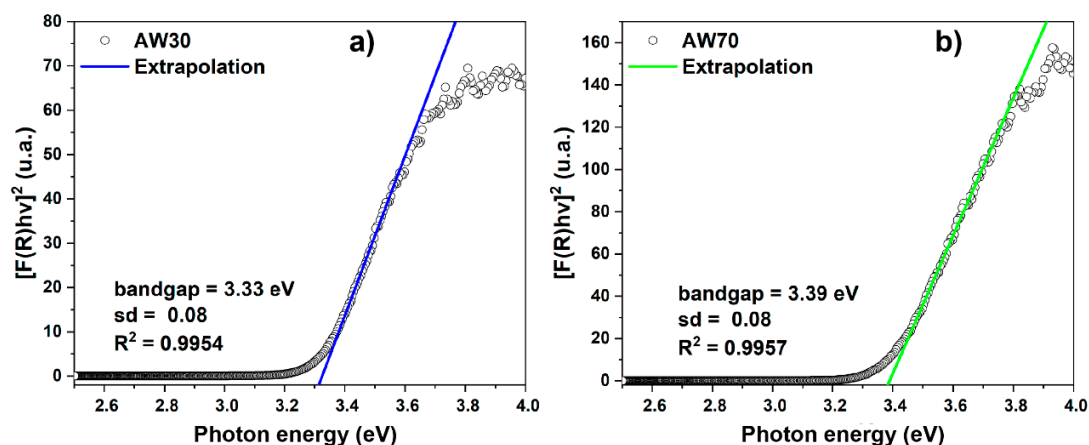

**Figure S3.** Experimental results for optical band-gap of AW30 (a) and AW70 (b) samples.

**Table S1.** Fractional coordinates obtained by the Rietveld refinement.

|     | AW30     |           |          | AW70     |           |          |
|-----|----------|-----------|----------|----------|-----------|----------|
|     | x        | y         | z        | x        | y         | z        |
| W1  | 0.262367 | -0.009582 | 0.521632 | 0.255283 | -0.010205 | 0.519976 |
| W2  | 0.000000 | 0.827752  | 0.500000 | 0.000000 | 0.826171  | 0.500000 |
| W3  | 0.000000 | 0.135121  | 0.500000 | 0.000000 | 0.130182  | 0.500000 |
| Ag1 | 0.760114 | 0.165467  | 0.981932 | 0.770772 | 0.178727  | 0.178727 |
| Ag2 | 0.242968 | 0.813939  | 0.021946 | 0.241297 | 0.814576  | 0.006961 |
| Ag3 | 0.000000 | 1.003177  | 0.000000 | 0.000000 | 1.003591  | 0.000000 |
| Ag4 | 0.000000 | 0.657241  | 0.000000 | 0.000000 | 0.675470  | 0.000000 |
| Ag5 | 0.000000 | 0.310176  | 0.000000 | 0.000000 | 0.320256  | 0.000000 |
| Ag6 | 0.000000 | 0.528033  | 0.500000 | 0.000000 | 0.521279  | 0.500000 |
| O1  | 0.344174 | 0.583366  | 0.223340 | 0.409588 | 0.591737  | 0.282998 |
| O2  | 0.345977 | 0.278656  | 0.175404 | 0.273139 | 0.150680  | 0.031570 |
| O3  | 0.434305 | 0.738509  | 0.921136 | 0.437821 | 0.760253  | 1.065789 |
| O4  | 0.381162 | 0.262220  | 0.605675 | 0.414100 | 0.244000  | 0.777100 |
| O5  | 0.142877 | 0.454266  | 0.348650 | 0.151100 | 0.475000  | 0.267100 |
| O6  | 0.441036 | 0.465904  | 0.820478 | 0.403100 | 0.477000  | 0.832100 |
| O7  | 0.219983 | 0.646933  | 0.919857 | 0.178100 | 0.593000  | 0.842100 |
| O8  | 0.179342 | 0.379744  | 0.851900 | 0.182100 | 0.360000  | 0.885100 |
